# Supplementary material
Source: Springer Nature journal article supplement (https://www.springermedizin.de/resource/supplementary/12889_2012_4672_MOESM1_ESM.pdf/9490578)
Supplement: MOESM1 [file 9490578]

Online Screen

*Self-reported height & weight*  
*Weight loss practices*  
*Physical activity readiness*

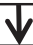

Phone Screen

*Health status & medication use*  
*Contraindications to exercise*  
*Complete 1 week of dietary self-monitoring*

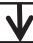

Orientation, Final Screening, & Baseline

*Study presentation & equipoise induction*  
*Informed consent process*  
*Anthropomorphic measurements*  
*Eating disorder & substance screening*  
*Technology competency task*  
*Accelerometer worn for 10 days*

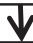

Pretreatment Session

*Dietary recall with dietician*  
*Treadmill task*
